# The C-terminal domains SnRK2-box and ABA-box have a role in sugarcane SnRK2s auto-activation and activity

Germannna Righetto<sup>1</sup>, Dev Sriranganadane<sup>2,3</sup>, Levon Halabelian<sup>4</sup>, Carla G. Chiodi<sup>2,3</sup>, Jonathan M. Elkins<sup>3,5</sup>, Katlin B. Massirer<sup>2,3</sup>, Opher Gileadi<sup>5</sup>, Marcelo Menossi<sup>1</sup>, Rafael M. Couñago<sup>2,3,\*</sup>

1 Functional Genome Laboratory, Department of Genetics, Evolution, and Bioagents, Institute of Biology, State University of Campinas, Campinas, SP, Brazil.

2 Centro de Química Medicinal (CQMED), Centro de Biologia Molecular e Engenharia Genética (CBMEG), Universidade Estadual de Campinas (UNICAMP), Campinas, SP, 13083-875, Brazil.

3 Structural Genomics Consortium, Departamento de Genética e Evolução, Instituto de Biologia, UNICAMP, Campinas, SP, 13083-886, Brazil

4 Structural Genomics Consortium, MaRS Centre, South Tower, 101 College St., Suite 700, Toronto, ON, M5G 1L7, Canada.

5 Structural Genomics Consortium, Nuffield Department of Medicine, University of Oxford, Oxford OX3 7DQ, UK.

\* Corresponding author: Rafael M. Couñago ([rafael.counago@unicamp.br](mailto:rafael.counago@unicamp.br))

## Abstract

Resistance to drought stress is fundamental to plant survival and development. Abscisic acid (ABA) is one of the major hormones involved in different types of abiotic and biotic stress responses. ABA intracellular signaling has been extensively explored in *Arabidopsis thaliana* and occurs via a phosphorylation cascade mediated by three related protein kinases, denominated SnRK2s (SNF1-related protein kinases). However, the role of ABA signaling and the biochemistry of SnRK2 in crop plants remains underexplored. Considering the importance of the ABA hormone in abiotic stress tolerance, here we investigated the regulatory mechanism of sugarcane SnRK2s - known as SAPKs (Stress/ABA-activated Protein Kinases). The crystal structure of ScSAPK10 revealed the characteristic SnRK2 family architecture, in which the regulatory SnRK2-box interacts with the kinase domain  $\alpha$ C helix. To study sugarcane SnRK2 regulation, we produced a series of mutants for the protein regulatory domains SnRK2-box and ABA-box. Surprisingly, mutations in the SnRK2-box did not drastically affect sugarcane SnRK2 activity, in contrast to previous observations for the homologous proteins in *Arabidopsis*. Also, we found that the ABA-box might have a role in SnRK2 activation in the absence of PP2C phosphatase. Taken together, our

43 results demonstrate that both C-terminal domains of sugarcane SnRK2 proteins play a  
44 fundamental role in protein activation and activity.

45

## 46 **Keywords**

47 Abscisic acid, abiotic stress, SnRK2, crop plant, kinase regulation, sugarcane

48

## 49 **INTRODUCTION**

50 The phytohormone abscisic acid (ABA) is a central regulator of plant responses to  
51 abiotic stress. ABA triggers protective plant responses leading to stomatal closure, seed  
52 dormancy, inhibition of growth, and germination (Fujii et al., 2007; Fujii and Zhu,  
53 2009; Mustilli, 2002; Yoshida et al., 2002, 2006). ABA's signaling role is carried out by  
54 a protein phosphorylation cascade that depends on the interplay between the activities of  
55 SnRK2 kinases and protein phosphatase 2C (PP2C) (Fujii et al., 2009; Umezawa et al.,  
56 2010).

57 In dicotyledons, members of the SnRK2 sub-family of serine-threonine kinases  
58 (SnRK2.2/2.3/2.6 in Arabidopsis) act as positive regulators of ABA signaling and  
59 activate downstream stress-responsive genes and transcription factors (Fujii et al., 2009;  
60 Fujii and Zhu, 2009; Fujita et al., 2009; Nakashima et al., 2009). Counterpart kinases in  
61 monocots are known as SAPK8/9/10 (Stress/ABA-activated Protein Kinases) (Belin et  
62 al., 2006; Kobayashi et al., 2004; Yoshida et al., 2006). ABA-responsive kinases from  
63 both mono- and dicotyledons are expected to have a conserved modular architecture and  
64 to be involved in environmental sensing and stress response (Kulik et al., 2011).

65 The C-terminal SnRK2-box is essential for kinase activation by hyperosmotic stress and  
66 displays high sequence conservation among members of the SnRK2 subfamily  
67 (Kobayashi et al., 2004; Yoshida et al., 2006). The crystallographic structures of  
68 Arabidopsis SnRK2.3 and 2.6 have shown that the SnRK2-box folds into a helix and  
69 packs against the catalytically important  $\alpha$ C helix within the protein kinase domain (Ng  
70 et al., 2011; Yunta et al., 2011). Mutational studies have demonstrated that the  
71 interaction between these two helices is crucial for kinase autoactivation and subsequent  
72 phosphorylation of the transcription factor ABF2 (Ng et al., 2011).

73 SnRK2/SAPK activity is modulated by direct interaction with PP2C phosphatases,  
74 which, in turn, depends on intracellular ABA levels. In presence of the hormone, the  
75 phosphatase activity is impaired by the interaction with the complex formed by ABA  
76 and PYL/PYR/RCAR receptors (Ma et al., 2009; Melcher et al., 2009; Miyazono et al.,  
77 2009; Nakashima et al., 2009; Park et al., 2009; Umezawa et al., 2009; Yin et al., 2009).  
78 The complex blocks PP2C substrate entry and prevents SnRK2 inactivation by  
79 dephosphorylation. In the absence of ABA, PP2C is released from the complex with  
80 PYL/PYR/RCAR receptors and can interact with the SnRK2 kinases, leading to kinase  
81 dephosphorylation and repression of ABA-response. The interaction between kinase  
82 and phosphatase is mediated by another C-terminal motif, known as ABA-box, only

83 preserved in the ABA-responsive members of the SnRK2 subfamily (Soon et al., 2012;  
84 Umezawa et al., 2009; Vlad et al., 2009).

85 Despite extensive characterization in Arabidopsis, the protein structure and biochemical  
86 regulation of ABA-responsive SnRK2s from crop plants remain poorly explored.  
87 SnRK2 subfamily members have been identified in several crop plants, such as rice,  
88 maize and cotton (Huai et al., 2008; Kobayashi et al., 2004; Liu et al., 2017). Just like  
89 their counterparts from Arabidopsis, these proteins have been shown to mediate plant  
90 responses to abiotic stress and ABA. In *Saccharum officinarum* L. (So) sugarcane, a  
91 recent study identified ten SnRK2 subfamily members, three of which (SoSAPK8/9/10)  
92 have the characteristic ABA-box in their C-terminus and, accordingly, are responsive to  
93 ABA (Li et al., 2017). Despite these studies, currently, there is no structural information  
94 on SnRK2 subfamily members from crop plants. Moreover, the role of the regulatory  
95 domains SnRK2-box and ABA-box in protein activity and activation remain unclear for  
96 sugarcane and other crop plants.

97  
98 In this study, we report the crystal structure of SAPK10 from the crop plant sugarcane  
99 (*Saccharum* ssp. hybrids). We also investigated how SnRK2- and ABA-boxes modulate  
100 the activity of SAPK8/9/10. These analyses confirmed that, overall, the SnRK2-box  
101 within sugarcane SAPKs preserves its role in protein activity, albeit to a lesser extent  
102 when compared to the Arabidopsis proteins. Finally, we identified several auto-  
103 phosphorylated sites within SAPK kinase surface that might have a role in their  
104 interaction with PP2C and/or downstream partners.

105

## 106 MATERIAL AND METHODS

### 107 Gene identification and bioinformatics analyses

108 The sequences of *ScSAPK8*, *ScSAPK9* and *ScSAPK10* were identified using the  
109 Sugarcane Expressed Sequence Tag (SUCEST) database and the homologous sequences  
110 from *Sorghum bicolor* (*SbSAPK8*: Sb01g007120, *SbSAPK9*: Sb08g019700 and  
111 *SbSAPK10*: Sb01g014720 and *Arabidopsis thaliana* (*SnRK2.2*: 824214, *SnRK2.3*:  
112 836822, *SnRK2.6*: 829541) as reference (Vettore et al., 2003). The coding sequences of  
113 the three sugarcane SAPKs were isolated from the sugarcane leaf cDNA (cultivar SP80-  
114 3280) using specific primers (Supplementary Table S1).

115 For analysis of protein conservation, protein sequences from *Arabidopsis thaliana*, and  
116 *Saccharum* spp were aligned using BioEdit and Clustal Omega (Hall, 1999; Sievers  
117 and Higgins, 2014). The sequence similarities, as well as the secondary structure  
118 elements, were further analyzed using the ESPript 3.0 program (Robert and Gouet,  
119 2014). The analysis of protein domains was performed using PFAM and SMART  
120 databases (Finn et al., 2016; Schultz et al., 1998).

121

### 122 *ScSAPKs* cloning and recombinant protein expression in *Escherichia coli*

123 The full-length sequences of *ScSAPK8/9/10* were cloned into pNIC28-Bsa4 using the  
124 ligase-independent cloning (LIC) method (Savitsky et al., 2010). For large scale protein  
125 expression, the constructs were transformed into *E. coli* strain BL21(DE3)-R3-pRARE2

126 (Savitsky et al., 2010) and grown in 20 mL of LB medium with kanamycin (50 mg/mL)  
127 and incubated at 37 °C. After overnight growth, the bacterial culture was inoculated into  
128 1.5 L of Terrific Broth medium with kanamycin (50 mg/mL), which was incubated at  
129 37 °C with shaking until an OD<sub>600</sub> of 1.5. The culture was cooled to 18 °C before the  
130 addition of 0.2 mM of IPTG (Isopropyl β-D-1-thiogalactopyranoside) for overnight  
131 expression. Cells were harvested by centrifugation at 7,500 ×g at 4 °C and suspended in  
132 approximately 20 mL of 2X lysis buffer (100 mM HEPES pH 7.5; 1 M NaCl, 20 mM  
133 imidazole, 20% glycerol) with 1 μL per mL protease inhibitor cocktail. Suspended cells  
134 were placed on ice and sonicated for 9 min (5 s ON; 10 s OFF; 30% amplitude).  
135 Polyethyleneimine (pH 7.5) was added to the lysate at 0.15 % final concentration and  
136 the lysate was clarified by centrifugation at 53,000 ×g for 45 min at 4 °C. The  
137 supernatant was loaded onto an IMAC column (5 mL HisTrap FF Crude) and washed  
138 with Binding Buffer (50 mM HEPES pH 7.4, 500 mM NaCl, 5% glycerol, 10 mM  
139 imidazole pH 7.4, 0.5 mM tris(2-carboxyethyl)phosphine (TCEP)) and Wash Buffer (50  
140 mM HEPES pH 7.4, 500 mM NaCl, 5% glycerol, 30 mM imidazole pH 7.4, 0.5 mM  
141 TCEP). The protein was eluted with 10 mL of Elution Buffer (50 mM HEPES pH 7.4,  
142 500 mM NaCl, 5% glycerol, 300 mM imidazole pH 7.4, 0.5 mM TCEP) in 2 mL  
143 fractions. The eluted fractions were combined and incubated with TEV protease during  
144 overnight dialysis against GF Buffer (Binding Buffer without imidazole). TEV protease,  
145 as well as the cleaved 6xHis-tag, were removed using nickel-affinity chromatography  
146 resin. The protein was concentrated to 5 mL with a 30 kDa MWCO spin concentrator  
147 and loaded onto a size exclusion HiLoad 16/60 Superdex 200pg (GE) column  
148 equilibrated in GF buffer. Fractions of 1.8 mL were collected and verified for protein  
149 purity on a 12% SDS-PAGE gel. Purified fractions were combined, concentrated and  
150 stored at -80 °C.

151

### 152 **ScSAPK10 crystallization, data collection and structure determination**

153 For crystallization experiments, the truncated construct of ScSAPK10 corresponding to  
154 amino acids 12 to 320 (ScSAPK10\_ΔNterm-ΔABA-box) was cloned and the  
155 recombinant protein produced as above. Before setting up crystallization trials, protein  
156 aliquots at 24 mg/mL were thawed and centrifuged at 15,000 rpm for 10 min at 4 °C.  
157 Crystallization sitting drops were manually mounted using 1:1 ratio of protein to  
158 reservoir solution (1.5M ammonium sulfate; 0.1M bis-tris pH 6.5 and 0.1M sodium  
159 chloride– *Index Screen*, Hampton Research). Crystals grew after 2 days at 20 °C and  
160 were cryoprotected in reservoir solution supplemented with 30% glycerol before flash-  
161 cooling in liquid nitrogen. Diffraction data was collected at the Advanced Photon  
162 Source (Chicago, USA) beamline 19ID. The X-ray diffraction data was integrated with  
163 XDS (Kabsch, 2010) and scaled using AIMLESS from the CCP4 software suite (Winn  
164 et al., 2011). The structure was solved by molecular replacement using Phenix (Adams  
165 et al., 2002) and the *Arabidopsis thaliana* SnRK2.6 structure (PDB ID 3ZUT) as the  
166 initial model (Yunta et al., 2011). Refinement was performed using REFMAC5  
167 (Murshudov et al., 2011). Coot (Emsley et al., 2010) was used for manual model-  
168 building and local refinement. Structure validation was performed using MolProbity  
169 (Chen et al., 2010). Structure coordinates have been deposited in the Protein Data Bank  
170 (PDB ID 5WAX) (Table 1).

171

172 **Site-directed mutagenesis and ScSAPK8 expression for phosphorylation assays**

173 The SnRK2-box and ABA-box mutants were produced by site-directed mutagenesis  
174 with specific primers (Supplementary Table S1) using as template the full-length  
175 construct of ScSAPK8 cloned in pNIC28-Bsa4. The mutated constructs were confirmed  
176 by sequencing and transformed in *E. coli* BL21(DE3)-R3 cells which express rare  
177 tRNAs (plasmid pACYC-LIC+) and the  $\lambda$ -phosphatase.

178 All proteins were expressed at the same time using the same protocol described  
179 previously. After bacterial culture lysis, the clarified supernatants were loaded in 4 mL  
180 of Ni<sup>2+</sup>-sepharose beads (GE Healthcare, Uppsala), washed with Binding Buffer (4 x 4  
181 mL) and Wash Buffer (3 x 4 mL). The proteins were eluted with Elution Buffer (4 x 4  
182 mL), and the imidazole was removed using Sephadex G-25 PD-10 Desalting Columns  
183 (GE Healthcare, Uppsala). Protein purity was analyzed by SDS-PAGE gel and protein  
184 masses were confirmed by intact mass spectrometry.

185

186 **ScSAPK8 WT and mutants autophosphorylation assay**

187 Each protein (diluted in GF buffer to 20  $\mu$ M final concentration) was incubated with 10  
188 mM MgCl<sub>2</sub> and 1 mM ATP (Sigma – catalog A7699) at 20 °C in a final volume of 200  
189  $\mu$ L. After every time point (1 hour, 5 hours and overnight), 20  $\mu$ L of aliquots were  
190 removed and the reaction stopped by the addition of 10 mM EDTA. Samples were  
191 analyzed by LC-MS. For these assays, the protein concentration was estimated by  
192 Bradford (Sigma-Aldrich) and SDS-PAGE analysis (Supplementary Figure S1).

193

194 **Kinase activity assay**

195 The enzymatic activity of ScSAPK8 WT and SnRK2-box and ABA-box mutants was  
196 measured using a TR-FRET based assay (Cisbio Kinase - catalog #62ST1PEB). Prior  
197 to the enzymatic reaction, proteins were diluted in GF buffer supplemented with 10 mM  
198 MgCl<sub>2</sub> to a 20  $\mu$ M final concentration and incubated overnight at 20 °C with or without  
199 1 mM ATP. After 16 hours, the activity of proteins pre-incubated with Mg<sup>2+</sup>/ATP and  
200 Mg<sup>2+</sup> was tested using the peptide STK-1 at 1  $\mu$ M final concentration. Final assay  
201 concentrations were: 50 nM kinase, 2 mM ATP, 10 mM MgCl<sub>2</sub> and 1 mM DTT. The  
202 reaction was allowed to progress for 1 hour at room temperature before the detection  
203 step was performed according to the manufacturer's instructions. FRET signal was  
204 acquired using a ClarioStar fluorescence plate reader (BMG Labtech)  
205 (excitation/emission wavelengths of 330 and 620/650 nm, respectively). Results  
206 reported are from two independent experiments performed in triplicates.

207

208 **ScSAPK8 WT phosphosite identification**

209 Purified ScSAPK8 WT and  $\Delta$ ABA-box mutant (20  $\mu$ M final concentration) were  
210 diluted in GF buffer supplemented with 10 mM MgCl<sub>2</sub> and incubated with 1 mM ATP  
211 (Sigma – catalog A7699) overnight at 20 °C. The reaction was stopped by adding 10  
212 mM EDTA (final concentration) before samples flash-freezing in liquid nitrogen.  
213 Protein intact mass was determined by LC-MS and phosphosites were identified by LC-  
214 MS/MS. The sample was buffer-exchanged into 50 mM Ammonium Bicarbonate and  
215 treated with 25  $\mu$ L of RapiGest SF (0.2% - Waters Corp. catalog # 186001861) for 15  
216 min at 80 °C. Dithiothreitol (DTT - 100 mM stock prepared in 50 mM Ammonium  
217 Bicarbonate) was added to a final concentration of 4 mM and the mixture was incubated

218 for 30 min at 60 °C. Iodoacetamide (IAA - 300 mM stock prepared in 50 mM  
219 Ammonium Bicarbonate) was added to the mixture at a final concentration of 12 mM.  
220 The mixture was protected from light and incubated for 30 min. Trypsin (Promega,  
221 Fitchburg, WI, USA - catalog # V511A) prepared in 50 mM Ammonium Bicarbonate  
222 was added to the mixture (1:100 mass ratio of trypsin to protein) and incubated for 16 hr  
223 at 37 °C under agitation. To hydrolyze the RapiGest, Trifluoroacetic acid (TFA - Pierce,  
224 Waltham, MA, USA; catalog # 53102) was added and the mixture incubated for 90 min  
225 at 37 °C. The reaction was centrifuged at 14,000 rpm for 30 min at 6 °C and the  
226 supernatant transferred to a fresh microcentrifuge tube (Axygen, Union City, CA, USA)  
227 for subsequent LC-MSMS analysis.

228

### 229 **Mass spectrometry analysis**

230 For intact mass analysis, samples were analyzed via reverse phase HPLC-ESI-MS in  
231 positive ion mode using an Acquity H-class HPLC system coupled to an XEVO G2 Xs  
232 Q-ToF mass spectrometer (both from Waters Corp.). A total of 0.5 µL sample (~12.5  
233 ng) in mobile phase Solvent A (0.1% formic acid - FA, prepared in water) was applied  
234 onto a C4 column (ACQUITY UPLC Protein BEH C<sub>4</sub> 300 Å, 1.7 µm, 2.1 mm X 100  
235 mm - Waters Corp.) kept at 45 °C. Bound protein was eluted by a gradient of 10-90%  
236 Solvent B (0.1% FA in 100% Acetonitrile - ACN) over 4 min. Between each injection,  
237 the column was regenerated with 90% Solvent B (for 90 sec) and re-equilibrated to 10%  
238 Solvent B (210 sec). Flow rates were 0.5 µL/min for sample application and 0.4 mL/min  
239 (wash and elution). For internal calibration, the lockspray properties were: scan time of  
240 0.5 sec; and a mass window of 0.5 Da around Leu-enkephalin (556.2771 Da). The ToF-  
241 MS acquisition ranged from 100 to 2,000 Da with a scan time of 1 sec. The cone  
242 voltage on the ESI source was fixed at 40 V.

243 For phosphosite identification, samples were analyzed by reverse phase nanoLC-ESI-  
244 MSMS using an Acquity M-class HPLC system coupled to an XEVO G2 Xs Q-ToF  
245 (both from Waters Corp.). A total of 2 µL sample in mobile Solvent A was applied onto  
246 a Trap column (V/M, Symmetry C18, 100Å, 5 µm, 180 µm x 20 mm) connected to an  
247 HSS T3 C18 column (75 µm x 150 mm, 1.8 µm), kept at 45 °C. LC was performed at a  
248 flow rate of 400 nL/min, and the elution of bound peptides was performed over a 47  
249 min gradient as follows: 0-30.37 min from 7-40% Solvent B; 30.37-32.03 min from 40-  
250 85% Solvent B; 32.34-35.34 min at 85% Solvent B; 35.34-37 min from 85-7% Solvent  
251 B and 37-47 min at 7% B. The nano-ESI source was set with the following parameters:  
252 the capillary voltage was 2.5 kV, the sampling cone and the source offset was set at 30  
253 V, the temperature source was 70 °C, the gas flow and the purge gas were set at 50 and  
254 150 L/h, and the nano gas flow was maintained at 0.5 bar. Data were acquired at 0.5  
255 scan/s, over the mass range of 50-2000 m/z in positive and sensitive mode. The MS  
256 data-independent acquisition mode was used with a low energy collision switched off  
257 and a high collision energy ramp 15-45 eV in the second function for fragmentation. For  
258 mass accuracy, the Glu-Fibrinopeptide (785.84261 Da 2+) was used as lock mass at a  
259 concentration of 100 fM (in 40:60 ACN/H<sub>2</sub>O, 0.1% FA) infused at a flow rate of 0.5  
260 µL/min via a lock spray interface and an auxiliary pump. Lock mass scans were  
261 acquired every 30 s at a rate of 0.5 scan/s. Lockmass was acquired but not applied on  
262 the fly.

263

## 264 MS data analysis

265 MS raw data was analyzed using MassLynx v4.1 and processed by MaxEnt 1 (both  
266 from Waters Corp.) in order to deconvolute multi-charged combined ion spectra for  
267 intact mass analysis. Phosphoproteomic raw data were processed using Protein Lynx  
268 Global Server (PLGS, Waters Corp.) against the sugarcane protein database (UniProt  
269 release 2017\_12). Data processing was performed in two steps. First, PLGS extracted  
270 all acquired spectra using the following parameters: lock mass (charge 2= 785.84261  
271 Da/e) window set to 0.4 Da; low energy threshold fixed at 500 counts; elevated energy  
272 threshold at 50 counts; chromatographic peak width and MS ToF Resolution were set to  
273 automatic. Then, a database search was performed with the following parameters:  
274 peptide and fragment tolerance were set to automatic; 2 fragments ion matches per  
275 peptide and 5 fragments ion matches per protein were fixed, as well as a minimum of 1  
276 peptide match per protein; one missed cleavage was allowed; trypsin was set as the  
277 primary digestion; carbamidomethylation of cysteine was set as a fixed modification,  
278 oxidation of methionine and phosphorylation of Ser/Thr/Tyr residues were set as a  
279 variable modification.

280

## 281 RESULTS

### 282 ABA-responsive SnRK2s in sugarcane

283 Three ABA-responsive SnRK2s were identified within the sugarcane genome  
284 (*S. spontaneum* × *S. officinarum* hybrid cultivar) using homologous protein sequences  
285 from *Arabidopsis thaliana* and *Sorghum bicolor*. Based on previous studies in monocots  
286 and dicots, these were designated ScSAPK8, ScSAPK9 and ScSAPK10 (Boudsocq et  
287 al., 2004; Cai et al., 2014; Fujii et al., 2009; Fujita et al., 2009; Kobayashi et al., 2004;  
288 LI et al., 2010; Li et al., 2017).

289 At the amino acid level, sugarcane and *A. thaliana* proteins share high sequence  
290 identity ( $\geq 76\%$ ) (Figure 1). Moreover, ABA-responsive SnRK2s and their sugarcane  
291 counterparts display an identical modular architecture, in which the N-terminal kinase  
292 domain (KD; ~260 amino acids) is followed by two highly conserved motifs - the  
293 SnRK2-box (16 amino acids) and ABA-box (27 amino acids) (Supplementary Figure  
294 S2). The function of the N-terminal regions of each protein (about twenty residues)  
295 remains to be elucidated.

### 296 Sugarcane and *A. thaliana* ABA-responsive SnRKs share a conserved kinase fold

297 To better understand the mechanism of sugarcane ABA-responsive SnRKs, we  
298 pursued crystallization of all three ScSAPK proteins. Despite our best efforts, we could  
299 not obtain diffraction quality crystals of ScSAPK8 or ScSAPK9. To improve the  
300 diffraction quality of initial ScSAPK10 crystals, we used a truncated version of the  
301 protein (residues 12 to 320) in which residues at both N- and C-terminal regions were  
302 removed, including the ABA-box. The protein structure was solved at 2.0 Å resolution  
303 by molecular replacement using the AtSnRK2.6 structure (PDB ID: 3ZUT) (Yunta et  
304 al., 2011) as a model (Table 1).

305 ScSAPK10 has a canonical kinase fold: a bilobal structure formed by a smaller  
306 N-terminal lobe and a larger C-terminal lobe connected by a short hinge region (Figure  
307 2A). The protein N-terminal lobe is composed of five antiparallel  $\beta$ -strands, including  
308 the ATP-binding loop (P-loop) between  $\beta$ 1 and  $\beta$ 2, and the  $\alpha$ C helix (Pearce et al.,  
309 2010). The C-terminal lobe contains the activation loop and several  $\alpha$ -helices. Residues  
310 within the ScSAPK10 SnRK2-box (Met304 – Pro320) are folded into an  $\alpha$ -helix and  
311 packed against  $\alpha$ C from the protein kinase domain (Figure 2B). No electron density was  
312 observed for residues in the activation loop (residues 165 to 181) or the region of the  
313 protein connecting the kinase domain and the SnRK2-box (residues 279 to 294), likely  
314 due to flexibility. These regions were omitted from the final model.

315 Superposition of ScSAPK10 onto the structures of AtSnRK2.3 and 2.6 (Ng et  
316 al., 2011; Yunta et al., 2011) confirmed our expectation that ABA-responsive SnRK2s  
317 from mono and dicot plants are structurally similar - ScSAPK10 and AtSnRK2.3 root  
318 mean square deviation (r.m.s.d.): 2.32 Å; ScSAPK10 and AtSnRK2.6 r.m.s.d: 1.35 Å -  
319 (Figure 2D). In the crystal, ScSAPK10 adopted an inactive conformation in which the  
320 side chain of Phe153 within the conserved kinase motif DFG points towards the ATP-  
321 binding site. In this inactive conformation, structurally conserved regions of the kinase  
322 domain important for phosphate transfer are kept apart. Moreover, the protein P-loop  
323 was found folded towards the kinase hinge region, an orientation that is likely to prevent  
324 binding of ATP (Figure 2C).

### 325 **SnRK2s-box structure and function are conserved between ScSAPK and AtSnRKs**

326 As seen for other SnRK2 family members, ScSAPK10 SnRK2-box is packed  
327 against the  $\alpha$ C helix, within the protein kinase domain (Figure 2). Contacts between  $\alpha$ C  
328 and the SnRK2-box are facilitated by conserved amino acids bearing aliphatic side  
329 chains (Figure 3A-C). Previous studies have shown that single-point mutations  
330 disturbing hydrophobic interactions between  $\alpha$ C and SnRK2-box decreased kinase  
331 activity of AtSnRK2s (Ng et al., 2011). Considering the high levels of conservation  
332 between ScSAPKs and their *A. thaliana* counterparts, we decided to investigate if a  
333 similar mechanism could regulate the activity of the sugarcane proteins.

334 To measure the activity of recombinantly expressed ScSAPKs we employed a  
335 commercially-available enzymatic assay (KinEASE, Cisbio) and a generic peptide  
336 substrate (STK1 from the same vendor). Amongst the three sugarcane proteins,  
337 ScSAPK8 was the most active enzyme in this assay (data not shown). We thus decided  
338 to study the impact of disrupting the interaction between SnRK2-box and  $\alpha$ C helix on  
339 the activity of ScSAPK8.

340 We used site-directed mutagenesis to substitute conserved SnRK2-box residues  
341 (Met312, Ile315 or Leu319) with an alanine. Under the experimental condition with no  
342 pre-incubation with ATP, the activities of ScSAPK8 mutants M312A and I315A were  
343 statistically lower than the observed to wild type enzyme (one-way ANOVA *post-hoc*  
344 Dunnett's,  $n = 6$ ,  $p = 0.0416$  comparing WT to M312A and  $p = 0.0114$  for WT and  
345 I315A; ANOVA  $p = 0.0011$ ) whereas L319A activity was comparable to wild type ( $p =$   
346  $0.7021$ ) (Figure 3D). AtSnRK2s are known to be activated by autophosphorylation



347 (Fujii et al., 2009; Ng et al., 2011). We then investigated the impact of pre-incubating  
348 wild-type and mutant ScSAPK8s with ATP (16 hours at 25 °C) before assaying their  
349 activity. Pre-incubation with ATP statistically increased the baseline activity of wild-  
350 type and the L319A mutant (two-way ANOVA *post-hoc* Bonferroni's,  $p < 0.0001$ ,  $n =$   
351 6), whereas activity for mutant M312A remained unaltered ( $p > 0.9999$ ). Surprisingly,  
352 the overall activity of I315A was significantly reduced ( $p = 0.0034$ ) (Figure 3D).

353 To verify if the reduced activity observed for mutants M312 and I315A resulted  
354 from the inability of these proteins to self-activate, we used LC-MS to obtain the intact  
355 masses of wild-type and mutant proteins. The total number of phosphosites observed  
356 after 16-hour incubation with ATP remained the same for wild-type and mutant proteins  
357 M312A and I315A (Supplementary Figure S3, S4, and S5). Thus, the reduced activities  
358 observed for these two mutant proteins were not due to a defect in their auto-  
359 phosphorylation abilities. Surprisingly, mutant L319A displayed three additional  
360 phosphosites compared to the wild-type and the other two mutants investigated (Table  
361 2; Supplementary Figure S3 and S6).

362 Taken together, our results indicate that mutations designed to disrupt the  
363 interaction between the  $\alpha$ C helix and SnRK2s-box coordination in sugarcane SAPK8  
364 did not abolish enzyme activity. Nevertheless, changes in residues Met312 and Ile315  
365 did reduce the overall protein activity after a longer (16-hour) period in the presence of  
366 ATP, an effect that might be due to the mutant proteins having lower stability than the  
367 wild-type or the L319A mutant.

### 368 **Deletion of SAPK8 ABA-box does not directly affect its activity**

369 In addition to the SnRK2-box, another conserved C-terminal region is involved  
370 in SnRK2 regulation in dicot plants – the ABA-box (Belin et al., 2006; Boudsocq et al.,  
371 2007; Soon et al., 2012). This region mediates the interaction between SnRK2s and  
372 PP2C phosphatases, leading to kinase inactivation via dephosphorylation of an essential  
373 activation loop serine residue and preventing substrate access to the kinase catalytic site  
374 (Belin et al., 2006; Soon et al., 2012). Here we investigated ScSAPK8 ABA-box  
375 contribution to kinase activity in the absence of a PP2C phosphatase. For that, we used  
376 the enzymatic assay described above to assess the activity of several ScSAPK8 C-  
377 terminal mutants designed to either completely remove the protein ABA-box or disrupt  
378 the region's acidic character via replacement of conserved acidic residues with alanines  
379 (Figure 4A).

380 All ScSAPK8 mutants displayed similar overall activity to the wild-type protein.  
381 Likewise, pre-treatment with ATP (16 hours at 25 °C) significantly increased enzyme  
382 activity for all proteins tested (two-way ANOVA *post-hoc* Bonferroni's,  $p < 0.0001$ ,  $n =$   
383 6) (Figure 4B). We also used LC-MS to assess the impact of ScSAPK8 ABA-box on  
384 protein auto-phosphorylation. Interestingly, more phosphosites could be detected for  
385 ScSAPK8 point mutants than for the wild-type protein (7 versus 4 phosphosites,  
386 respectively) (Table 2; Supplementary Figure S3, S8 to S11). On the other hand, a  
387 single phosphorylation was detected in the truncated version of ScSAPK8 completely  
388 lacking the ABA-box in the intact mass analysis (Table 2 and Supplementary Figure

389 S7). Similar results were observed for the ScSAPK10  $\Delta$ ABA-box protein (data not  
390 shown).

391 Taken together, the data above suggest that ScSAPK8 ABA-box is important for  
392 protein overall phosphorylation state, but, by itself, this conserved motif does not  
393 regulate enzyme activity.

### 394 **Structure of SAPK10 suggests a conserved interaction mechanism with PP2C-type** 395 **phosphatases.**

396 Structural studies revealed that AtSnRK2.6 and PP2C-type phosphatases display  
397 complementary electrostatic surfaces at the complex interface (Soon et al., 2012). An  
398 overlay of the structures of ScSAPK10 and SnRK2.6 bound to a PP2C-type phosphatase  
399 (AtHAB1), revealed that both kinases display similar electrostatic surfaces within the  
400 SnRK2.6 region known to interact with PP2C-type phosphatases (Figure 4C).

401 We used LC-MS/MS to identify sites of autophosphorylation within ScSAPK8  
402 WT and  $\Delta$ ABA-box mutant (Table 3) and then mapped these onto our ScSAPK10  
403 crystal structure. Three (Ser36, Ser182, and Thr186) out of the 5 identified phosphosites  
404 in ScSAPK8 WT have structural equivalents in the Arabidopsis protein that are within  
405 the kinase:phosphatase complex interface (Figure 4D) (Soon et al., 2012). Curiously,  
406 only two phosphosites were observed in ScSAPK8  $\Delta$ ABA-box mutant, both located in  
407 the kinase:phosphatase complex interface.

408 These analyses suggest that the overall mechanism regulating the interaction of  
409 ABA-responsive kinases and PP2C-type phosphatases are conserved between  
410 Arabidopsis and sugarcane proteins.

## 411 **DISCUSSION**

412 ABA is a key hormone in both mono- and dicotyledon plants. In dicotyledons,  
413 members of the SnRK2 family of protein kinases play a central role in ABA signaling  
414 and act as positive regulators of this stress hormone (Fujii et al., 2009; Fujii and Zhu,  
415 2009; Fujita et al., 2009; Nakashima et al., 2009). It is expected that the signaling  
416 pathway relaying ABA stimuli is also conserved in monocot plants. Supporting this  
417 hypothesis, recent studies have shown that ABA strongly activates expression of  
418 SnRK2 counterparts in sugarcane (Li et al., 2017). Here we confirmed that three  
419 functional SnRK2 proteins - ScSAPK8, ScSAPK9, and ScSAPK10- are encoded by the  
420 sugarcane genome; further suggesting that the ABA-response pathway is conserved in  
421 both mono- and dicotyledons.

422 Our analyses of the ScSAPK structure and biochemistry strongly suggest that  
423 ABA-responsive kinases in sugarcane are functionally equivalent to their counterparts  
424 in Arabidopsis. The structure of ScSAPK10 revealed that the C-terminal SnRK2-box  
425 folds into an  $\alpha$ -helix and interacts with the structurally-conserved  $\alpha$ C from the protein  
426 kinase domain. A similar interaction has been reported for AtSnRK2 proteins and is  
427 thought important for kinase activity, akin to the activation mechanism of human  
428 cyclin-dependent kinases (Jeffrey et al., 1995; Ng et al., 2011). Nevertheless, the  
429 ScSAPK structure determined here and previously determined SnRK2 structures have

430 captured the protein in its inactive kinase state, despite the observed interaction between  
431  $\alpha$ C and SnRK2-box. Obtaining the structure of an SnRK2 family member in an active  
432 conformation would shed light on how SnRK2-box contributes to protein activity.

433 Biochemical assays have shown that disrupting hydrophobic contacts between  
434  $\alpha$ C and SnRK2-box via point mutations in AtSnRK2 abolished protein activity (Belin et  
435 al., 2006; Ng et al., 2011; Soon et al., 2012; Yunta et al., 2011). However, equivalent  
436 mutations in ScSAPK8 SnRK2-box had no to little effect on protein activity following  
437 no pre-incubation with ATP. Although we did see reduced activity for some of the  
438 SnRK2-box mutants after a 16-hour pre-incubation period with ATP, we cannot discard  
439 the possibility this reduced activity was due to differences in stability between wild-type  
440 and mutant proteins. Nevertheless, our results suggest that either the introduced  
441 mutations did not disrupt the SnRK2-box  $\alpha$ C interaction in ScSAPK8 or that this region  
442 is not critical for protein activity. It is difficult to conclude from *in vitro* experiments  
443 performed using different assays, and we believe this issue requires further exploration.  
444 More importantly, how, and if, the SnRK2-box interaction to  $\alpha$ C is modulated *in vivo*  
445 remains to be elucidated.

446 A second region important for regulating SnRK2 activity is the ABA-box. This  
447 region is a stretch of mostly acidic residues that mediate the direct interaction between  
448 SnRK2 proteins and basic patches on the surface of PP2C-type phosphatases (Soon et  
449 al., 2012). This interaction prevents the phosphorylation activity of SnRK2s. *In vitro*,  
450 total deletion of AtSnRK2.6 ABA-box did not affect protein activity. However, ectopic  
451 expression of this truncated protein in Arabidopsis *snrk2.6* mutants could not restore  
452 stomatal closure response. These same studies revealed that phosphorylation of sites  
453 within the kinase domain was important for promoting wild-type response to ABA  
454 (Belin et al., 2006; Yoshida et al., 2006).

455 Our data indicated that deleting ABA-box from ScSAPK8 did indeed reduce the  
456 overall number of autophosphorylation sites within this protein - from 5 in the wild-type  
457 protein to two in the  $\Delta$ ABA-box mutant. Nevertheless, deletion of ScSAPK8 ABA-box  
458 did not alter kinase activity on a generic peptide substrate, suggesting that  
459 autophosphorylation of residues located in the P-loop (Ser36) and activation loop  
460 (Ser182) might be sufficient for full kinase activity *in vitro*. However, the lack of  
461 activity of the  $\Delta$ ABA-box SnRK2 mutant in Arabidopsis might indicate a role of the  
462 additional phosphorylation events in kinase activity *in vivo*. In addition, the peptide  
463 analysis (Table 3) of ScSAPK8 WT and  $\Delta$ ABA-box mutant presented an increased  
464 number of phosphorylation sites for both proteins when compared to intact mass  
465 analysis (Table 2). The intact mass analysis represents the measurement of all different  
466 phospho-states of a certain protein in a mixture while the peptide analysis allows the  
467 precise identification of phosphosite position. In our work, the discrepancy between the  
468 intact mass and the number of phosphosites identified for ScSAPK8 WT and  $\Delta$ ABA-  
469 box mutant might indicate that S36 and S182 phosphorylation could not co-exist in the  
470 same molecule of protein. In this scenario, the intact mass analysis would result in a  
471 single phospho-state corresponding to two different phosphosites only unveil after  
472 protein digestion. The underlying mechanism behind these observations is not clear at  
473 this moment and will require further investigation.

474           The activation loop is a structurally conserved feature of protein kinases, and  
475 phosphorylation of key residues within this region stabilizes the protein in an active  
476 conformation (Nolen et al., 2004). In Arabidopsis SnRK2s, phosphorylation of a serine  
477 residue (Ser175 in SnRK2.6) within the protein activation loop is essential for kinase  
478 activation (Belin et al., 2006; Boudsocq et al., 2007; Ng et al., 2011; Vlad et al., 2009).  
479 We identified the equivalent residue in ScSAPK8 as phosphorylated after incubation  
480 with Mg<sup>2+</sup>/ATP, further suggesting that SnRK2 family members from both monocots  
481 and dicots display similar regulatory mechanisms.

## 482 **CONCLUSION**

483 Here, we determined the crystallographic structure and performed the biochemical  
484 characterization of ABA-related SnRK2 proteins from the crop plant sugarcane. Our  
485 analyses suggest a role for ScSAPK ABA-box in protein autophosphorylation but not in  
486 overall enzyme activity. Moreover, disrupting the SnRK2-box:αC interaction had no to  
487 little effect in ScSAPK8 kinase activity, despite the structural conservation between  
488 sugarcane and Arabidopsis proteins. Future studies are required to evaluate the role of  
489 these two conserved regions, as well as that of the multiple phosphosites identified here,  
490 in kinase activation and activity *in planta*.

## 491 REFERENCES

- 492 Adams, P. D., Grosse-Kunstleve, R. W., Hung, L. W., Ioerger, T. R., McCoy, A. J.,  
493 Moriarty, N. W., et al. (2002). PHENIX: building new software for automated  
494 crystallographic structure determination. *Acta Crystallogr D Biol Crystallogr* 58,  
495 1948–1954. doi:S0907444902016657 [pii].
- 496 Belin, C., de Franco, P.-O., Bourbousse, C., Chaignepain, S., Schmitter, J.-M.,  
497 Vavasseur, A., et al. (2006). Identification of features regulating OST1 kinase  
498 activity and OST1 function in guard cells. *Plant Physiol.* 141, 1316–1327.  
499 doi:10.1104/pp.106.079327.
- 500 Boudsocq, M., Barbier-Brygoo, H., and Laurière, C. (2004). Identification of nine  
501 sucrose nonfermenting 1-related protein kinases 2 activated by hyperosmotic and  
502 saline stresses in *Arabidopsis thaliana*. *J. Biol. Chem.* 279, 41758–41766.  
503 doi:10.1074/jbc.M405259200.
- 504 Boudsocq, M., Droillard, M. J., Barbier-Brygoo, H., and Laurière, C. (2007). Different  
505 phosphorylation mechanisms are involved in the activation of sucrose non-  
506 fermenting 1 related protein kinases 2 by osmotic stresses and abscisic acid. *Plant*  
507 *Mol. Biol.* 63, 491–503. doi:10.1007/s11103-006-9103-1.
- 508 Cai, Z., Liu, J., Wang, H., Yang, C., Chen, Y., Li, Y., et al. (2014). GSK3-like kinases  
509 positively modulate abscisic acid signaling through phosphorylating subgroup III  
510 SnRK2s in *Arabidopsis*. *Proc. Natl. Acad. Sci.* 111, 9651–9656.  
511 doi:10.1073/pnas.1316717111.
- 512 Chen, V. B., Arendall, W. B., Headd, J. J., Keedy, D. A., Immormino, R. M., Kapral, G.  
513 J., et al. (2010). MolProbity: All-atom structure validation for macromolecular  
514 crystallography. *Acta Crystallogr. Sect. D Biol. Crystallogr.* 66, 12–21.  
515 doi:10.1107/S0907444909042073.
- 516 Emsley, P., Lohkamp, B., Scott, W. G., and Cowtan, K. (2010). Features and  
517 development of Coot. *Acta Crystallogr. Sect. D Biol. Crystallogr.* 66, 486–501.  
518 doi:10.1107/S0907444910007493.
- 519 Finn, R. D., Coghill, P., Eberhardt, R. Y., Eddy, S. R., Mistry, J., Mitchell, A. L., et al.  
520 (2016). The Pfam protein families database: Towards a more sustainable future.  
521 *Nucleic Acids Res.* 44, D279–D285. doi:10.1093/nar/gkv1344.
- 522 Fujii, H., Chinnusamy, V., Rodrigues, A., Rubio, S., Antoni, R., Park, S.-Y., et al.  
523 (2009). In vitro reconstitution of an abscisic acid signalling pathway. *Nature* 462,  
524 660–664. doi:10.1038/nature08599.
- 525 Fujii, H., Verslues, P. E., and Zhu, J.-K. (2007). Identification of Two Protein Kinases  
526 Required for Abscisic Acid Regulation of Seed Germination, Root Growth, and  
527 Gene Expression in *Arabidopsis*. *PLANT CELL ONLINE* 19, 485–494.  
528 doi:10.1105/tpc.106.048538.
- 529 Fujii, H., and Zhu, J.-K. (2009). *Arabidopsis* mutant deficient in 3 abscisic acid-  
530 activated protein kinases reveals critical roles in growth, reproduction, and stress.  
531 *Proc. Natl. Acad. Sci.* 106, 8380–8385. doi:10.1073/pnas.0903144106.
- 532 Fujita, Y., Nakashima, K., Yoshida, T., Katagiri, T., Kidokoro, S., Kanamori, N., et al.  
533 (2009). Three SnRK2 protein kinases are the main positive regulators of abscisic  
534 acid signaling in response to water stress in *Arabidopsis*. *Plant Cell Physiol* 50,  
535 2123–2132. doi:10.1093/pcp/pcp147pcp147 [pii].
- 536 Hall, T. A. (1999). BioEdit: a user-friendly biological sequence alignment editor and  
537 analysis program for Windows 95/98/NT. *Nucleic Acids Symp Ser* 41, 95–98.

- 538 doi:citeulike-article-id:691774.
- 539 Huai, J., Wang, M., He, J., Zheng, J., Dong, Z., Lv, H., et al. (2008). Cloning and  
540 characterization of the SnRK2 gene family from *Zea mays*. *Plant Cell Rep.* 27,  
541 1861–1868. doi:10.1007/s00299-008-0608-8.
- 542 Jeffrey, P. D., Russo, A. A., Polyak, K., Gibbs, E., Hurwitz, J., Massagué, J., et al.  
543 (1995). Mechanism of CDK activation revealed by the structure of a cyclinA-  
544 CDK2 complex. *Nature* 376, 313–320. doi:10.1038/376313a0.
- 545 Kabsch, W. (2010). XDS. *Acta Crystallogr D Biol Crystallogr* 66, 125–132.  
546 doi:10.1107/S0907444909047337.
- 547 Kobayashi, Y., Yamamoto, S., Minami, H., Kagaya, Y., and Hattori, T. (2004).  
548 Differential Activation of the Rice Sucrose Nonfermenting1–Related Protein  
549 Kinase2 Family by Hyperosmotic Stress and Abscisic Acid. *Plant Cell* 16, 1163–  
550 1177. doi:10.1105/tpc.019943.
- 551 Kulik, A., Wawer, I., Krzywińska, E., Bucholc, M., and Dobrowolska, G. (2011).  
552 SnRK2 Protein Kinases—Key Regulators of Plant Response to Abiotic Stresses.  
553 *Omi. A J. Integr. Biol.* 15, 859–872. doi:10.1089/omi.2011.0091.
- 554 Li, C., Nong, Q., Xie, J., Wang, Z., Liang, Q., Solanki, M. K., et al. (2017). Molecular  
555 Characterization and Co-expression Analysis of the SnRK2 Gene Family in  
556 Sugarcane (*Saccharum officinarum* L.). *Sci. Rep.* 7. doi:10.1038/s41598-017-  
557 16152-4.
- 558 LI, L. bin, ZHANG, Y. rong, LIU, K. chang, NI, Z. fu, FANG, Z. jun, SUN, Q. xin, et  
559 al. (2010). Identification and Bioinformatics Analysis of SnRK2 and CIPK Family  
560 Genes in Sorghum. *Agric. Sci. China* 9, 19–30. doi:10.1016/S1671-  
561 2927(09)60063-8.
- 562 Liu, Z., Ge, X., Yang, Z., Zhang, C., Zhao, G., Chen, E., et al. (2017). Genome-wide  
563 identification and characterization of SnRK2 gene family in cotton (*Gossypium*  
564 *hirsutum* L.). *BMC Genet.* 18, 54. doi:10.1186/s12863-017-0517-3.
- 565 Ma, Y., Szostkiewicz, I., Korte, A., Moes, D., Yang, Y., Christmann, A., et al. (2009).  
566 Regulators of PP2C phosphatase activity function as abscisic acid sensors. *Science*  
567 (80-. ). 324, 1064–1068. doi:10.1126/science.1172408.
- 568 Melcher, K., Ng, L. M., Zhou, X. E., Soon, F. F., Xu, Y., Suino-Powell, K. M., et al.  
569 (2009). A gate-latch-lock mechanism for hormone signalling by abscisic acid  
570 receptors. *Nature* 462, 602–608. doi:10.1038/nature08613.
- 571 Miyazono, K., Miyakawa, T., Sawano, Y., Kubota, K., Kang, H.-J., Asano, A., et al.  
572 (2009). Structural basis of abscisic acid signalling. *Nature* 462, 609–614.  
573 doi:10.1038/nature08583.
- 574 Murshudov, G. N., Skubák, P., Lebedev, A. A., Pannu, N. S., Steiner, R. A., Nicholls,  
575 R. A., et al. (2011). REFMAC5 for the refinement of macromolecular crystal  
576 structures. *Acta Crystallogr. Sect. D Biol. Crystallogr.* 67, 355–367.  
577 doi:10.1107/S0907444911001314.
- 578 Mustilli, A.-C. (2002). Arabidopsis OST1 Protein Kinase Mediates the Regulation of  
579 Stomatal Aperture by Abscisic Acid and Acts Upstream of Reactive Oxygen  
580 Species Production. *PLANT CELL ONLINE* 14, 3089–3099.  
581 doi:10.1105/tpc.007906.
- 582 Nakashima, K., Fujita, Y., Kanamori, N., Katagiri, T., Umezawa, T., Kidokoro, S., et al.  
583 (2009). Three arabidopsis SnRK2 protein kinases, SRK2D/SnRK2.2,  
584 SRK2E/SnRK2.6/OST1 and SRK2I/SnRK2.3, involved in ABA signaling are

- 585 essential for the control of seed development and dormancy. *Plant Cell Physiol.*  
586 50, 1345–1363. doi:10.1093/pcp/pcp083.
- 587 Ng, L.-M., Soon, F.-F., Zhou, X. E., West, G. M., Kovach, A., Suino-Powell, K. M., et  
588 al. (2011). Structural basis for basal activity and autoactivation of abscisic acid  
589 (ABA) signaling SnRK2 kinases. *Proc. Natl. Acad. Sci.* 108, 21259–21264.  
590 doi:10.1073/pnas.1118651109.
- 591 Nolen, B., Taylor, S., and Ghosh, G. (2004). Regulation of protein kinases: Controlling  
592 activity through activation segment conformation. *Mol. Cell* 15, 661–675.  
593 doi:10.1016/j.molcel.2004.08.024.
- 594 Park, S. Y., Fung, P., Nishimura, N., Jensen, D. R., Fujii, H., Zhao, Y., et al. (2009).  
595 Abscisic acid inhibits type 2C protein phosphatases via the PYR/PYL family of  
596 START proteins. *Science (80-. )*. 324, 1068–1071. doi:10.1126/science.1173041.
- 597 Pearce, L. R., Komander, D., and Alessi, D. R. (2010). The nuts and bolts of AGC  
598 protein kinases. *Nat. Rev. Mol. Cell Biol.* 11, 9–22. doi:10.1038/nrm2822.
- 599 Robert, X., and Gouet, P. (2014). Deciphering key features in protein structures with the  
600 new ENDscript server. *Nucleic Acids Res.* 42. doi:10.1093/nar/gku316.
- 601 Savitsky, P., Bray, J., Cooper, C. D. O., Marsden, B. D., Mahajan, P., Burgess-Brown,  
602 N. A., et al. (2010). High-throughput production of human proteins for  
603 crystallization: The SGC experience. *J. Struct. Biol.* 172, 3–13.  
604 doi:10.1016/j.jsb.2010.06.008.
- 605 Schultz, J., Milpetz, F., Bork, P., and Ponting, C. P. (1998). SMART, a simple modular  
606 architecture research tool: Identification of signaling domains. *Proc. Natl. Acad.*  
607 *Sci.* 95, 5857–5864. doi:10.1073/pnas.95.11.5857.
- 608 Sievers, F., and Higgins, D. G. (2014). “Clustal Omega, accurate alignment of very  
609 large numbers of sequences,” in *Multiple Sequence Alignment Methods, Methods*  
610 *in Molecular Biology*, 105–116. doi:10.1007/978-1-62703-646-7\_6.
- 611 Soon, F.-F., Ng, L.-M., Zhou, X. E., West, G. M., Kovach, A., Tan, M. H. E., et al.  
612 (2012). Molecular Mimicry Regulates ABA Signaling by SnRK2 Kinases and  
613 PP2C Phosphatases. *Science (80-. )*. 335, 85–88. doi:10.1126/science.1215106.
- 614 Umezawa, T., Nakashima, K., Miyakawa, T., Kuromori, T., Tanokura, M., Shinozaki,  
615 K., et al. (2010). Molecular basis of the core regulatory network in ABA responses:  
616 Sensing, signaling and transport. *Plant Cell Physiol.* 51, 1821–1839.  
617 doi:10.1093/pcp/pcq156.
- 618 Umezawa, T., Sugiyama, N., Mizoguchi, M., Hayashi, S., Myouga, F., Yamaguchi-  
619 Shinozaki, K., et al. (2009). Type 2C protein phosphatases directly regulate  
620 abscisic acid-activated protein kinases in Arabidopsis. *Proc. Natl. Acad. Sci.* 106,  
621 17588–17593. doi:10.1073/pnas.0907095106.
- 622 Vettore, A. L., da Silva, F. R., Kemper, E. L., Souza, G. M., da Silva, A. M., Ferro, M.  
623 I. T., et al. (2003). Analysis and functional annotation of an expressed sequence tag  
624 collection for tropical crop sugarcane. *Genome Res.* 13, 2725–2735.  
625 doi:10.1101/gr.1532103.
- 626 Vlad, F., Rubio, S., Rodrigues, A., Sirichandra, C., Belin, C., Robert, N., et al. (2009).  
627 Protein Phosphatases 2C Regulate the Activation of the Snf1-Related Kinase OST1  
628 by Abscisic Acid in Arabidopsis. *Plant Cell* 21, 3170–3184.  
629 doi:10.1105/tpc.109.069179.
- 630 Winn, M. D., Ballard, C. C., Cowtan, K. D., Dodson, E. J., Emsley, P., Evans, P. R., et  
631 al. (2011). Overview of the CCP4 suite and current developments. *Acta*

- 632 *Crystallogr. Sect. D Biol. Crystallogr.* 67, 235–242.  
633 doi:10.1107/S0907444910045749.
- 634 Yin, P., Fan, H., Hao, Q., Yuan, X., Wu, D., Pang, Y., et al. (2009). Structural insights  
635 into the mechanism of abscisic acid signaling by PYL proteins. *Nat. Struct. Mol.*  
636 *Biol.* 16, 1230–1236. doi:10.1038/nsmb.1730.
- 637 Yoshida, R., Hobo, T., Ichimura, K., Mizoguchi, T., Takahashi, F., Aronso, J., et al.  
638 (2002). ABA-activated SnRK2 protein kinase is required for dehydration stress  
639 signaling in Arabidopsis. *Plant Cell Physiol.* 43, 1473–1483.  
640 doi:10.1093/pcp/pcf188.
- 641 Yoshida, R., Umezawa, T., Mizoguchi, T., Takahashi, S., Takahashi, F., and Shinozaki,  
642 K. (2006). The regulatory domain of SRK2E/OST1/SnRK2.6 interacts with ABI1  
643 and integrates abscisic acid (ABA) and osmotic stress signals controlling stomatal  
644 closure in Arabidopsis. *J. Biol. Chem.* 281, 5310–5318.  
645 doi:10.1074/jbc.M509820200.
- 646 Yunta, C., Martínez-Ripoll, M., Zhu, J. K., and Albert, A. (2011). The structure of  
647 arabidopsis thaliana OST1 provides insights into the kinase regulation mechanism  
648 in response to osmotic stress. *J. Mol. Biol.* 414, 135–144.  
649 doi:10.1016/j.jmb.2011.09.041.

650

#### 651 **Author contributions**

652 Germanna Righetto participated in all parts of the project. Dev Sriranganadane performed all  
653 mass spec analysis. Levon Halabelian collected diffraction data. Carla G. Chiodi helped with  
654 protein expression and purification. Opher Gileadi coordinated the design of expression  
655 constructs. Rafael M. Counãgo coordinated crystal structure determination and refinement.  
656 Katlin B. Massirer, Jonathan Elkins, Marcelo Menossi and Rafael M. Counãgo coordinated the  
657 project. Germanna Righetto and Rafael M. Counãgo wrote the manuscript. All authors revised  
658 the manuscript.

#### 659 **Competing Interests**

660 The authors declare no competing interests.

661

#### 662 **Funding**

663 This work was supported by the Brazilian agencies FAPESP (Fundação de Amparo à Pesquisa  
664 do Estado de São Paulo) (2013/50724-5 and 2014/5087-0) and CNPq (Conselho Nacional de  
665 Desenvolvimento Científico e Tecnológico) (465651/2014-3). The SGC is a registered charity  
666 (number 1097737) that receives funds from AbbVie, Bayer Pharma AG, Boehringer Ingelheim,  
667 Canada Foundation for Innovation, Eshelman Institute for Innovation, Genome Canada,  
668 Innovative Medicines Initiative (EU/EFPIA) [ULTRA-DD grant no. 115766], Janssen, Merck  
669 KGaA Darmstadt Germany, MSD, Novartis Pharma AG, Ontario Ministry of Economic  
670 Development and Innovation, Pfizer, Takeda, and Wellcome [106169/ZZ14/Z]. Germanna  
671 Righetto received fellowships from CAPES (Coordenação de Aperfeiçoamento de Pessoal de  
672 Nível Superior) (33003017024P2) and CNPq (141368/2018-7). Carla G. Chiodi received a  
673 CAPES INCT fellowship (88887.158494/2017-00).

674

675

676

677



## 678 Acknowledgments

679

680 This research used the Pilatus 6M detector on 19-ID beamline of the Advanced Photon Source,  
681 a U.S. Department of Energy (DOE) Office of Science User Facility operated for the DOE  
682 Office of Science by Argonne National Laboratory under Contract No. DE-AC02-06CH11357.  
683 We thank the staff of the Life Sciences Core Facility (LaCTAD) from State University of  
684 Campinas (UNICAMP), for the genomics and proteomics analysis.

685

## 686 Data Availability Statement

687 The coordinates and structure factors for ScSAPK10 crystal structure reported here have been  
688 deposited in the Protein Data Bank with accession code 5WAX.

689

## 690 Legends and Tables

691

692 **Figure 1: Multiple-sequence alignment of ABA-related SnRK2s shows high**  
693 **similarity and identity between Arabidopsis and sugarcane sequences.** Residues  
694 colored in black are identical for all the sequences and residues highlighted by a black  
695 box share chemical similarity. Sequences corresponding to the P-loop, activation loop  
696 and the regulatory domains SnRK2-box and ABA-box are marked based on previous  
697 studies (Ng et al., 2011).

698

699 **Figure 2: Sugarcane SAPK10 has a canonical kinase fold and shows conserved**  
700 **SnRK2 regulatory domain packing. A and B:** Cartoon representation of the  
701 ScSAPK10 structure. Highlighted regions represent some of the key regions for kinase  
702 activity and/or regulation: ATP binding loop (red),  $\alpha$ C (purple), activation loop (orange)  
703 and SnRK2-box (green). The hinge region that connects the N- and C-terminal lobes of  
704 the kinase domain is colored in yellow. Residues Y165-T181 and D289-M304 were not  
705 resolved in the electron density. **C:** Cartoon representation of ScSAPK10 ATP-binding  
706 site. The ATP-binding loop (red), the activation loop residues D162 (pink) and F163  
707 (orange), as well as the residues K52 (grey) and E67 (purple) related to phosphate  
708 transfer, are highlighted. **D:** Structural alignment of ScSAPK10 (gray), Arabidopsis  
709 SnRK2.3 (PDB ID: 3UC3 - dark blue) and SnRK2.6 (PDB ID: 3ZUT - light blue).

710

711 **Figure 3: Key residues for SnRK2-box and  $\alpha$ C helix interaction are conserved in**  
712 **ScSAPK10 and affect protein activity. A:** Alignment of SnRK2-box residues from  
713 sugarcane SAPKs and SnRK2.6. Red stars represent the residues chosen for site-  
714 directed mutagenesis. The residue I315 is conserved in sugarcane and Arabidopsis  
715 SnRK2s while the residues M312 and Leu319 are conservatively substituted. **B:**  
716 Cartoon representation of SnRK2-box (green) from ScSAPK10\_Δ*nterm*-Δ*ABA-box*  
717 structure. ScSAPK10 SnRK2-box residues M307, I310 and L314 (homologous to  
718 ScSAPK8 M312, I315, and L319) are displayed as sticks and make close contact with  
719 the  $\alpha$ C helix surface. The electrostatic potential analysis shows the negative potential (in  
720 red) of the  $\alpha$ C surface. The positive potential is represented in blue. **C:** Cartoon  
721 representation of SnRK2-box (green) and the  $\alpha$ C helix (purple) from

722 ScSAPK10\_Δnterm-ΔABA-box structure. The electrostatic potential of αC surface was  
723 hidden to show the helix position. **D:** Box plot of the enzymatic activity of ScSAPK8  
724 WT and the mutants M312A, I315A and L319A after ATP incubation. The data show  
725 the quantity of phosphorylated peptide produced, measured by the ratio of fluorescence  
726 intensity at 665 nm (streptavidin-XL665 emission excited by phospho-specific Eu-  
727 cryptate conjugated antibody) and 620 nm (Eu-cryptate emission). In both assay  
728 conditions, the observed activity for ScSAPK8 WT was significantly higher than the  
729 mutants M312A (\**p* = 0.0416 for no ATP pre-incubation and \**p* < 0.0001 for 16h hours  
730 ATP pre-incubation) and I315A (\**p* = 0.0114 for no ATP pre-incubation and \**p* <  
731 0.0001 for 16h hours ATP pre-incubation). The L319A activity was similar to WT in  
732 both conditions but significantly increased with 16 hours of ATP pre-incubation (\**p* <  
733 0.0001).

734 **Figure 4: ScSAPK8 ABA-box mutations do not affect protein activity and might**  
735 **affect kinase interaction with PP2C phosphatase. A:** Alignment of ABA-box  
736 residues from sugarcane SAPKs and SnRK2.6. Mutations performed in ScSAPK8  
737 ABA-box are displayed in red and were distributed in four different groups, named  
738 group 1 to group 4. In the mutants from group 1 to group 3 all aspartic acid residues (D,  
739 in red) were replaced by alanine residues. In group 4, the residues of glutamic acid,  
740 isoleucine, tyrosine and methionine (respectively, E, I, Y and M, in red) were mutated  
741 to alanine **B:** Box plot of ScSAPK8 WT and ABA-box mutant enzymatic activity after  
742 ATP incubation. The data show the quantity of phosphorylated peptide produced,  
743 measured by the ratio of fluorescence intensity at 665 nm (streptavidin-XL665 emission  
744 excited by phospho-specific Eu-cryptate conjugated antibody) and 620 nm (Eu-cryptate  
745 emission). The analysis shows no statistically significant difference between the activity  
746 of WT and all the mutants tested. All the proteins presented significantly increased  
747 activity after 16 hours of ATP pre-incubation compared to the condition with no pre-  
748 incubation (*p* < 0.0001). **C:** Cartoon representation of ScSAPK10, AtSnRK2.6 and  
749 AtHAB1 protein surfaces. The electrostatic potential analysis shows the positive  
750 potential (in blue) of the protein surfaces around the activation segment and P-loop. **D:**  
751 Cartoon representation of ScSAPK10 (dark gray) aligned with AtSnRK2.6 (light gray)  
752 and AtHAB1 (represented as electrostatic surface). The orange spheres represents, in  
753 the ScSAPK10 structure, the homologous phosphosites identified to ScSAPK8 by mass  
754 spectrometry. The ScSAPK10 residues S31, S115, S177, T181 and A315 correspond to  
755 S36, S120, S182, T186 and T320 in ScSAPK8 sequence, respectively.

756

757 **Table 1: Data collection and refinement statistics**

| <b>Protein</b>                                      | <b>ScSAPK10</b>           |
|-----------------------------------------------------|---------------------------|
| <b>PDB ID</b>                                       | <b>5WAX</b>               |
| <b>Data collection</b>                              |                           |
| X-ray source                                        | APS 19-ID                 |
| Wavelength (Å)                                      | 0.979200                  |
| Space Group                                         | C 2 2 2 <sub>1</sub>      |
| Cell dimensions (Å) a, b, c.                        | 75.4, 214.6, 93.8         |
| Cell dimensions (°) $\alpha$ , $\beta$ , $\gamma$ . | 90, 90, 90                |
| Molecules/ asymmetric unit                          | 2                         |
| Resolution (Å)*                                     | 46.58 - 2.00 (2.05 - 2.0) |
| Unique reflections*                                 | 51563 (3763)              |
| $R_{merge}$ (%)*                                    | 8.3 (98.3)                |
| $I/\sigma(I)$ *                                     | 16.0 (1.6)                |
| CC (1/2)*                                           | 0.999 (0.604)             |
| Completeness (%)*                                   | 99.6 (99.9)               |
| Redundancy*                                         | 5.5 (5.6)                 |
| <b>Refinement</b>                                   |                           |
| Resolution (Å)*                                     | 46.58 - 2.00 (2.05 - 2.0) |
| $R_{cryst}/R_{free}$ (%)                            | 19.83 / 23.7              |
| No. Atoms (protein/ solvent)                        | 4360 / 387                |
| Mean B-factor (Å <sup>2</sup> )                     | 29.9                      |
| R.m.s.d bond lengths (Å), angles (°)                | 0.012, 1.49               |
| <b>Ramachandran statistics (%)</b>                  |                           |
| Favored / Allowed / Outliers                        | 96.3 / 3.7 / 0            |

758

759

760

761

762

\*Values in parentheses represent the highest resolution shell

763 **Table 2: Intact mass analysis of ScSAPK8 proteins after overnight incubation with**  
 764 **Mg<sup>2+</sup>/ATP**

| <b>Construct</b>        | <b>Total number of phosphorylations</b> |
|-------------------------|-----------------------------------------|
| ScSAPK8-WT              | 4                                       |
| ScSAPK8-M312A           | 4                                       |
| ScSAPK8-I315A           | 4                                       |
| ScSAPK8-L319A           | 7                                       |
| ScSAPK8 ABA-box group1  | 7                                       |
| ScSAPK8 ABA- box group2 | 7                                       |
| ScSAPK8 ABA-box group3  | 7                                       |
| ScSAPK8 ABA-box group4  | 7                                       |
| ScSAPK8 ΔABA-box        | 1                                       |

765

766 **Table 3: ScSAPK8 phosphopeptides identification by mass spectrometry**

| <b>Kinase</b>           | <b>Phosphorylated residue</b> | <b>Residue location</b> | <b>Total number of phosphorylations</b> |
|-------------------------|-------------------------------|-------------------------|-----------------------------------------|
| <b>ScSAPK8-WT</b>       | S36                           | P-loop                  | 5                                       |
|                         | S120                          | C-lobe                  |                                         |
|                         | S182                          | activation loop         |                                         |
|                         | T186                          | activation loop         |                                         |
|                         | T320                          | SnRK2-box               |                                         |
| <b>ScSAPK8 ΔABA-box</b> | S36                           | P-loop                  | 2                                       |
|                         | S182                          | activation loop         |                                         |

767

768

769 **Figure 1**

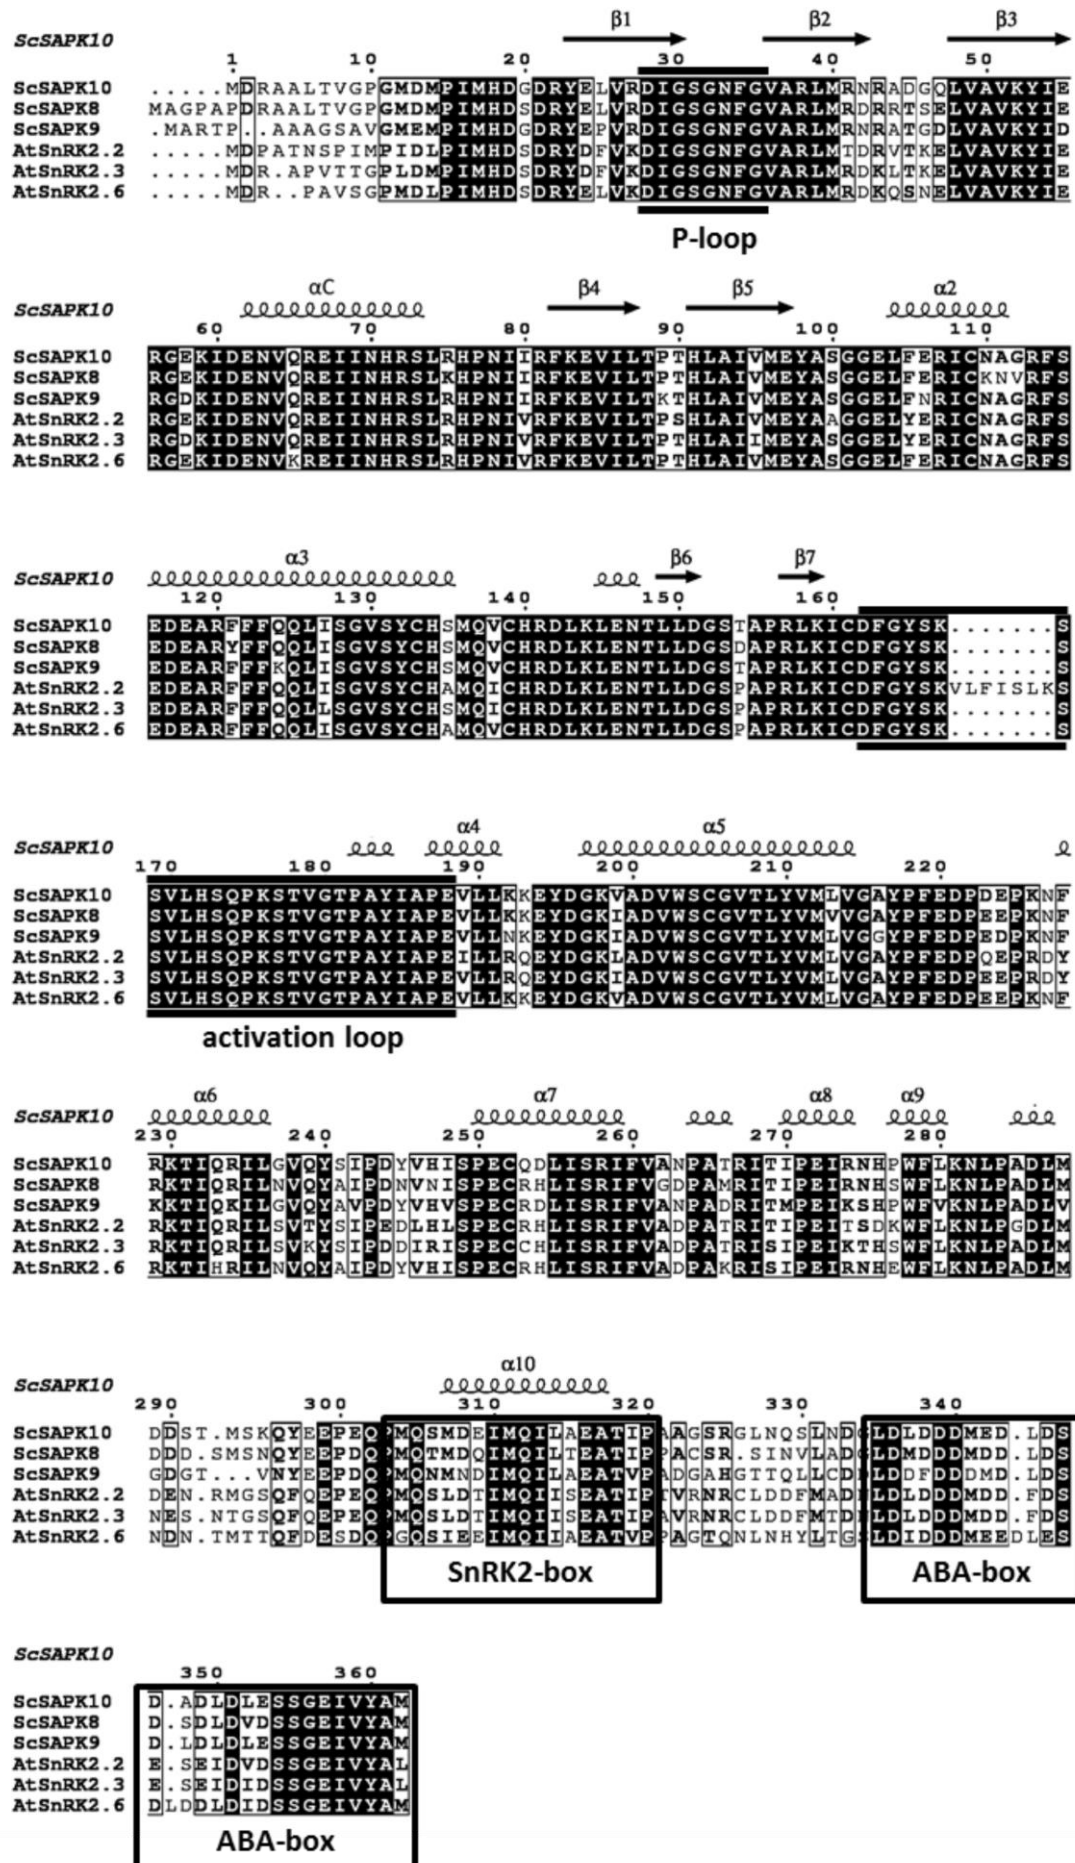

771 **Figure 2**

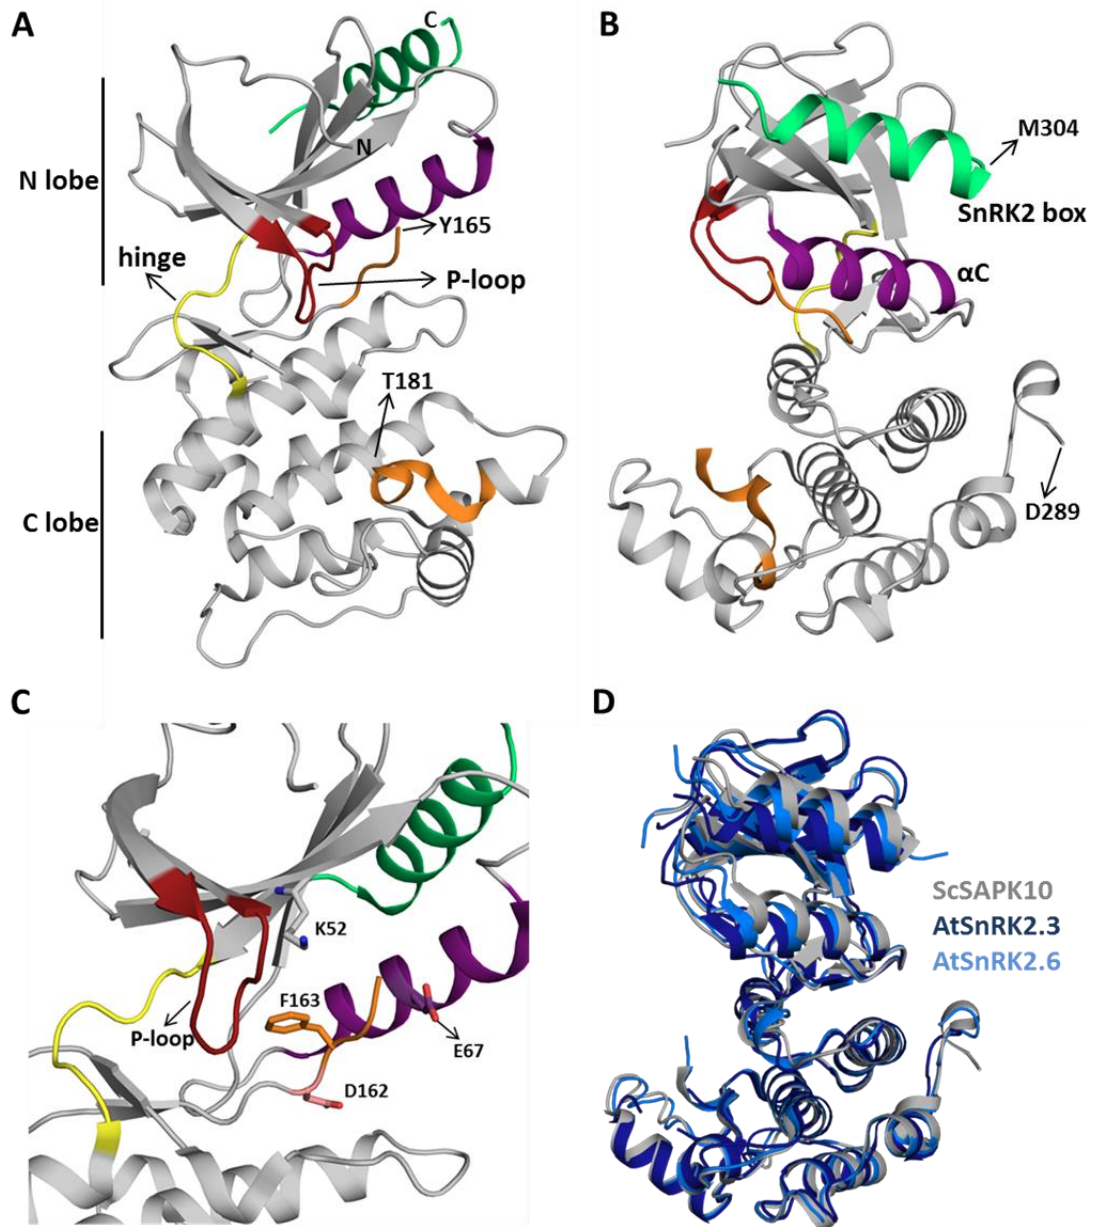

772

773

774

775

776

777

778

779

780

781 **Figure 3**

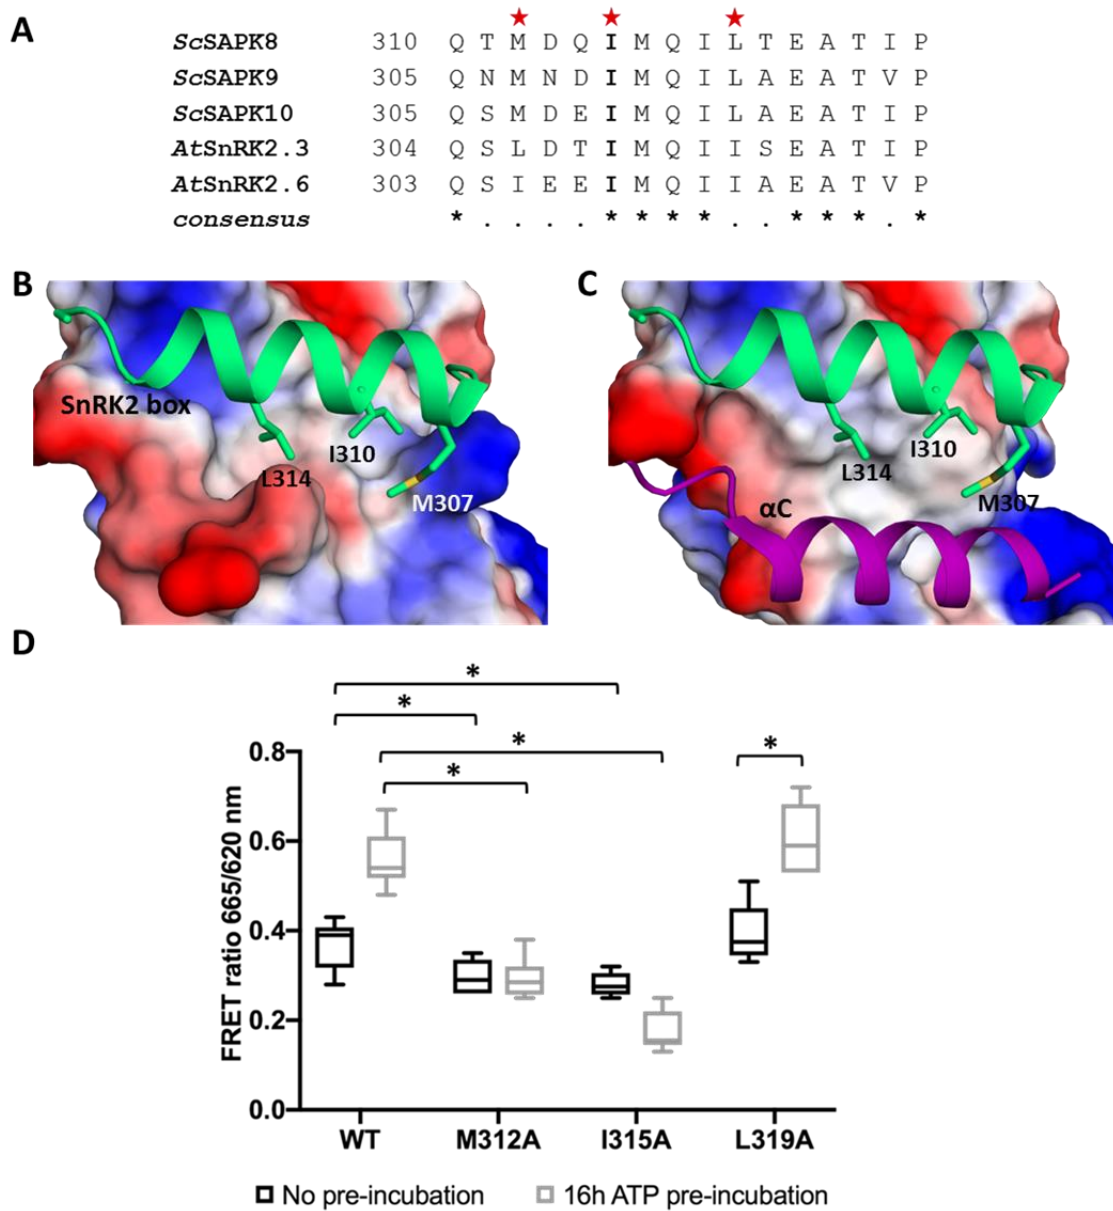

782

783

784

785

786

787

788

789

790

791

792 **Figure 4**

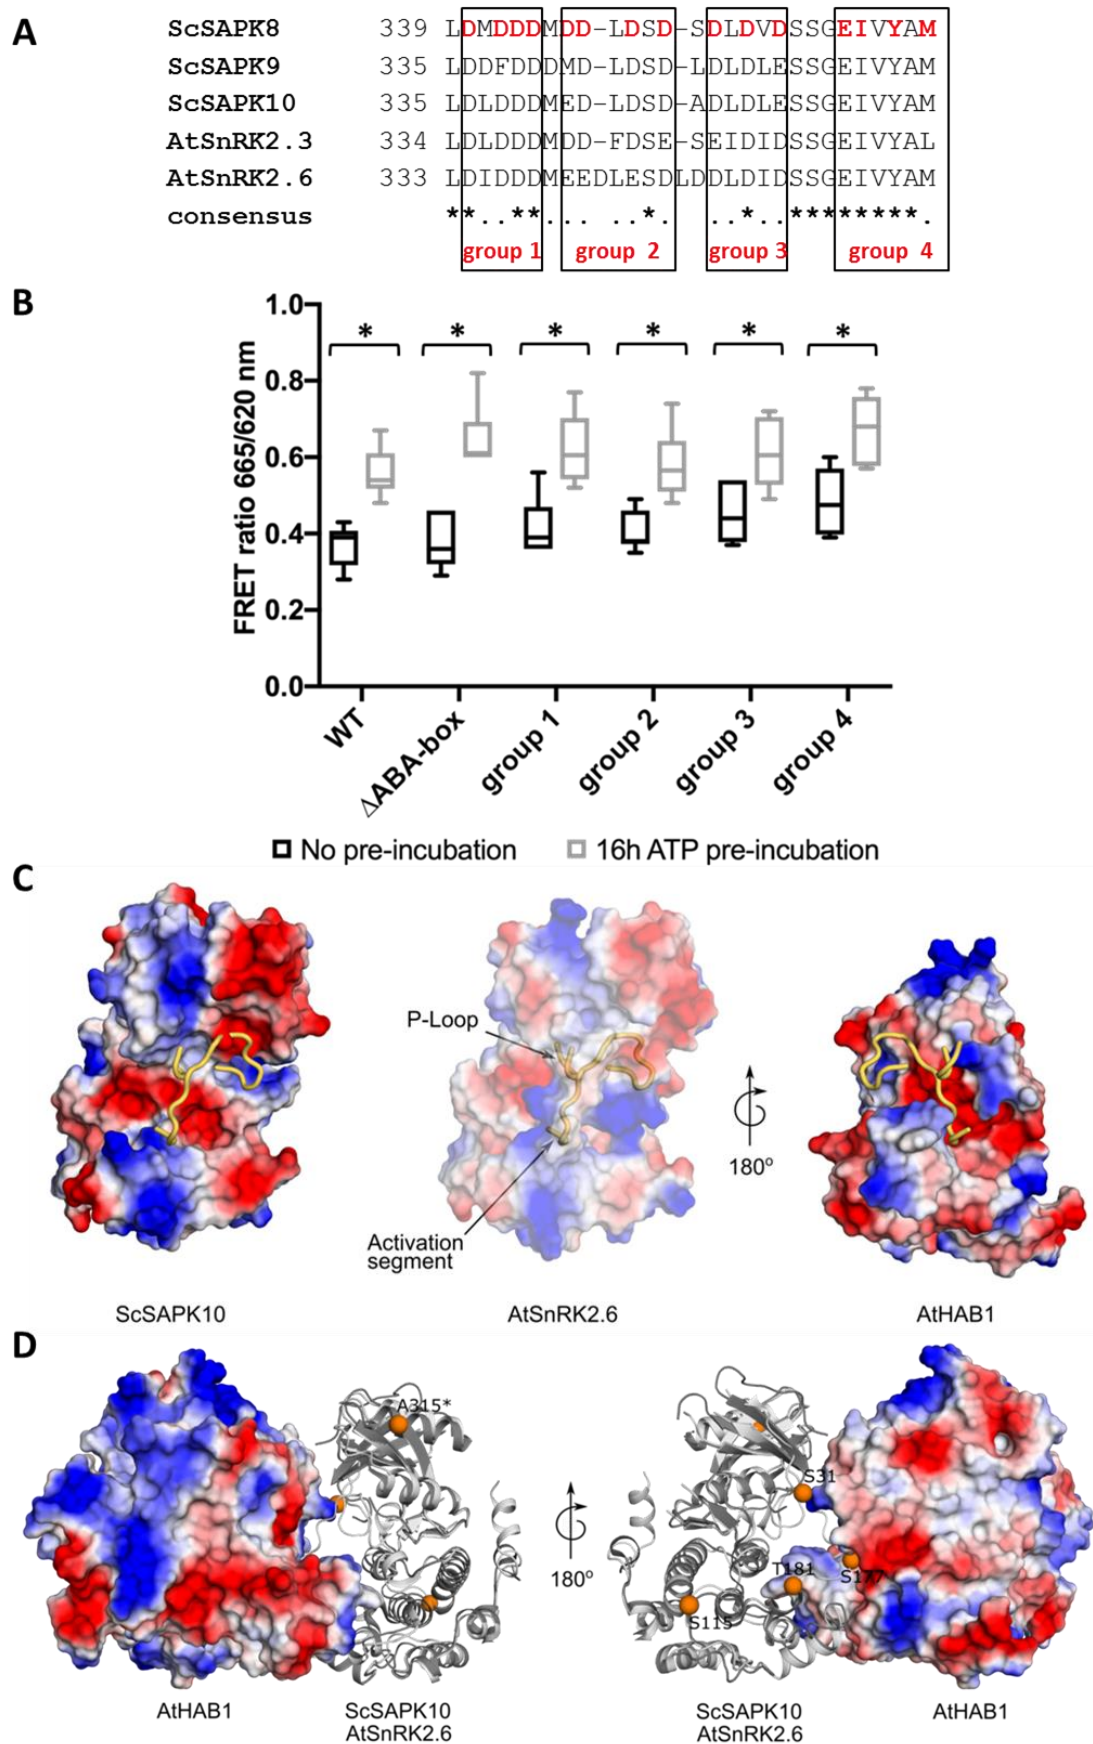

Source: http://biorxiv.org/content/10.1101/589903v1.full.pdf
